# Supplementary material
Source: PubMed Central journal article supplement (PMC11467860)
Supplement: NIHMS2025655-supplement-Supporting_Information.pdf [file NIHMS2025655-supplement-Supporting_Information.pdf]

**Supporting Information for:**

**Comparative Biochemical Studies of Disease-Associated Human Dicer Mutations on Processing of a pre-microRNA and snoRNA**

Rachel M. Torrez,<sup>1,2</sup> Shruti Nagaraja,<sup>1</sup> Arya Menon,<sup>1</sup> Louise Chang,<sup>2</sup> Melanie D. Ohi,<sup>2,3\*</sup> and Amanda L. Garner<sup>1\*</sup>

<sup>1</sup>Department of Medicinal Chemistry, College of Pharmacy, University of Michigan, 428 Church Street, Ann Arbor, Michigan 48109, USA

<sup>2</sup>Life Sciences Institute, University of Michigan, 210 Washtenaw Avenue, Ann Arbor, MI 48109, USA

<sup>3</sup>Department of Cell and Developmental Biology, University of Michigan Medical School, 109 Zina Pitcher Place, Ann Arbor, MI 48109, USA

\*Email: mohi@umich.edu; algarner@umich.edu

**List of Figures:**

Figure S1: Purification and negative stain EM analysis of recombinant WT and mutant hsDicers

Figure S2: Representative negative stain micrographs and corresponding 2D class averages for WT and mutant hsDicers

Figure S3: Replicates for EMSA binding assays in the presence of pre-miR-21, snord37 or blunt pre-miR-21

Figure S4: Replicates for Dicer cleavage assays in the presence of pre-miR-21, snord37 or blunt pre-miR-21

Figure S5: Transfection efficiency studies in Dicer1 <sup>-/-</sup> cells.

Figure S6: qRT-PCR replicates with corresponding Western blots showing relative protein levels of WT and mutant hsDicer

**List of Tables:**

Table S1: Gel quantification from EMSAs

Table S2: Gel quantification for cleavage assays

Table S3: Quantification of qRT-PCR from Figure S5

Table S4: Quantification of Western blots from Figure S5

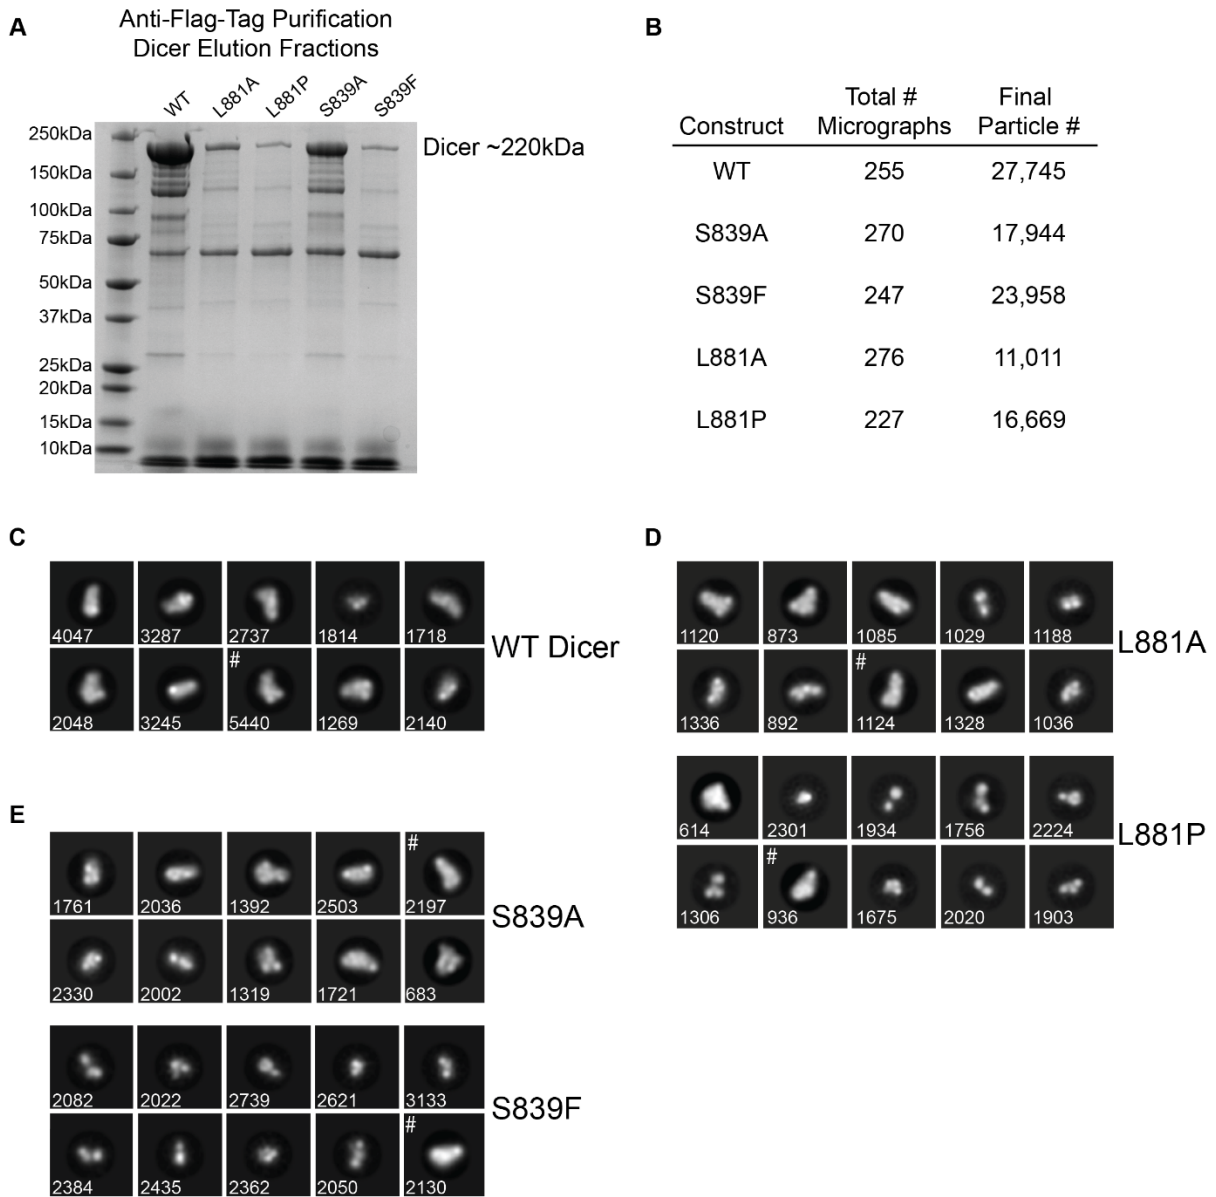

**Figure S1.** Purification and negative stain EM analysis of recombinant WT and mutant hsDicer (A) SDS-Page analysis of eluted fractions following anti-Flag tag purification of WT and mutant Dicer proteins. Band corresponding to WT and mutant Dicer (~220 kDa) is labeled. (B) Table outlining the total number of micrographs collected and final number of particles picked for negative stain analysis of WT and mutant Dicer. (C–E) 2D class averages from negative stain EM of analysis of (C) WT, (D) L881A and L881P mutants, and (E) S839A and S389F mutants. 2D class averages shown in Figure S2 labeled with #. The number of particles in each class average is shown in the bottom left corner. Side length of box, 37 nm.

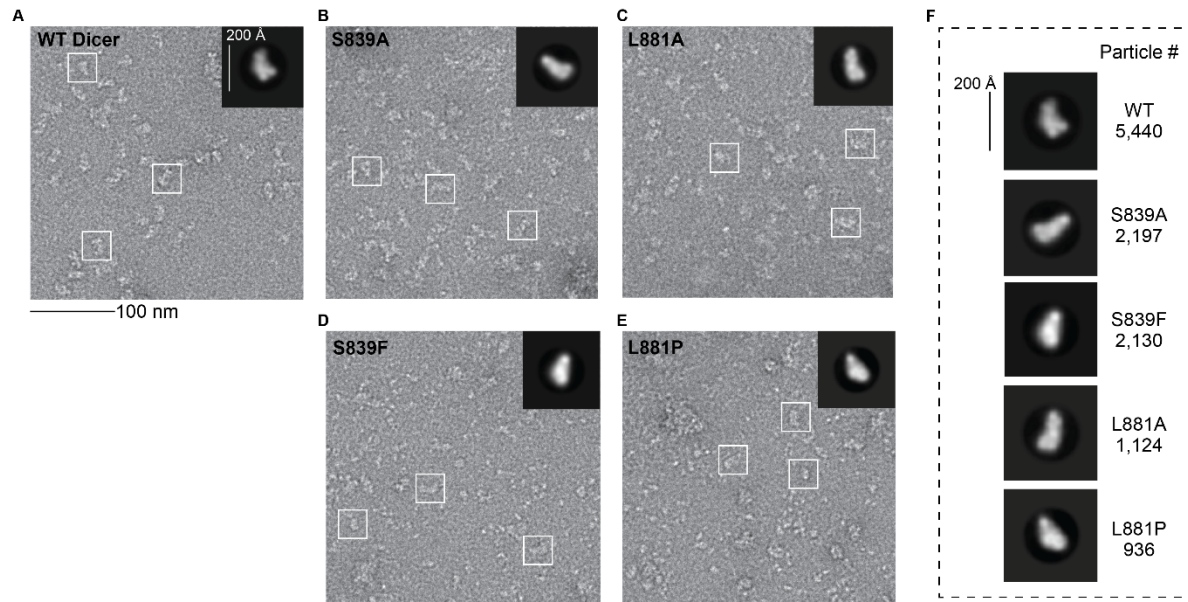

**Figure S2.** Negative stain EM analysis of recombinant WT and mutant Dicer. A representative negative stain micrograph and corresponding 2D class average are shown for (A) WT Dicer, (B) S839A, (C) L881A, (D) S839F, and (E) L881P. Examples of particles are outlined by a white dashed box. Scale bars shown in A the same for B–E. (F) Total number of particles contributing to the 2D class averages for WT or mutant Dicer.

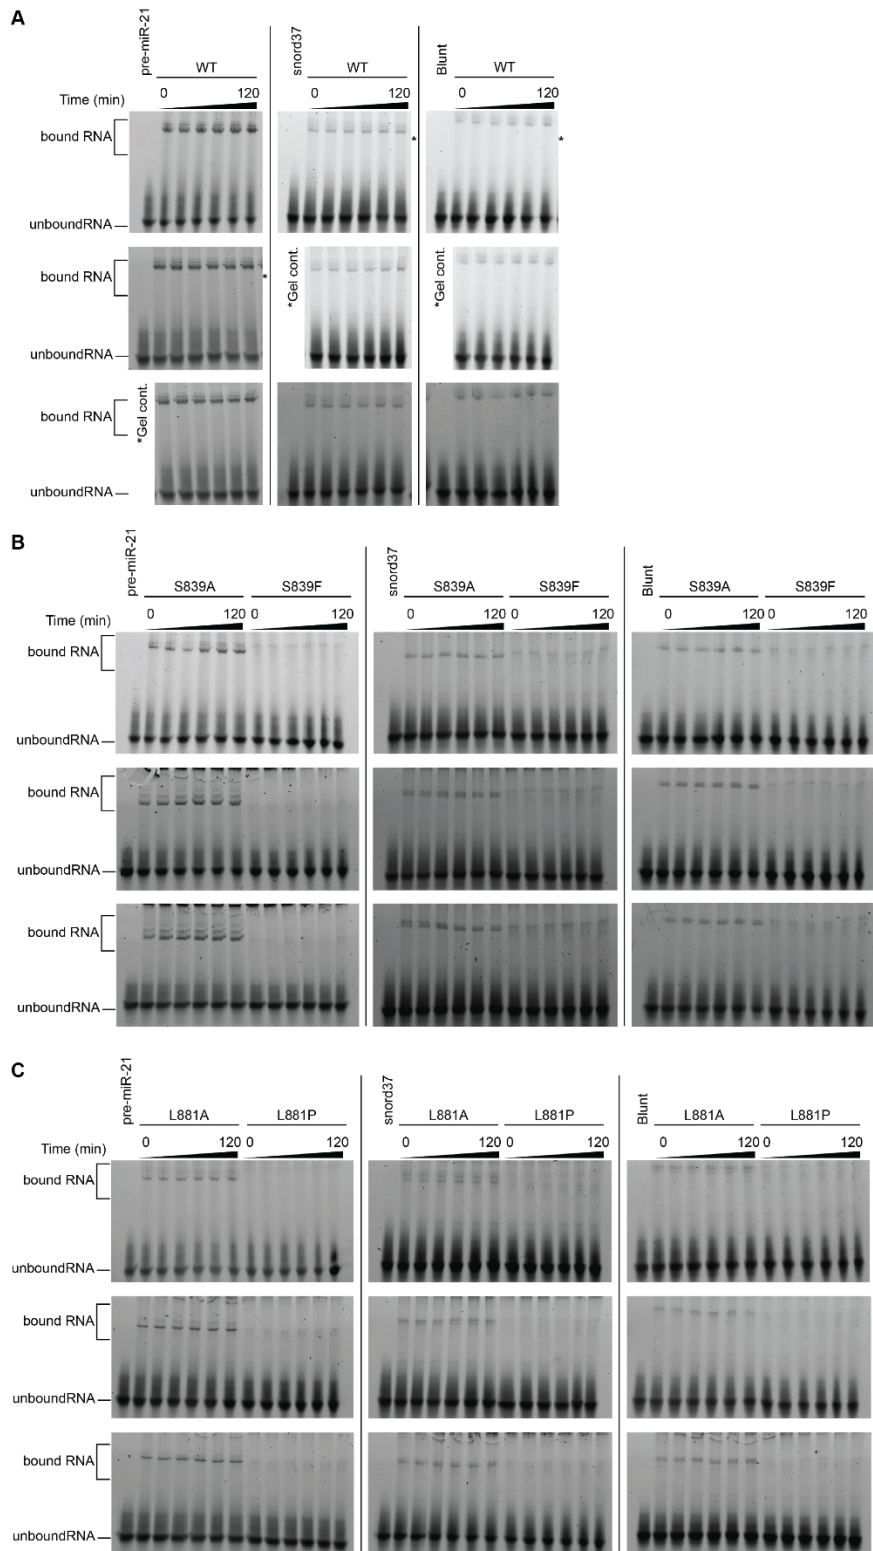

**Figure S3.** Replicates for EMSA binding assays in the presence of pre-miR-21, snord37 or Blunt-end pre-miR-21 (Blunt) for (A) WT Dicer, (B) S839 mutants and (C) L881 mutants. (\* signifies that experiment was ran on the same gel)

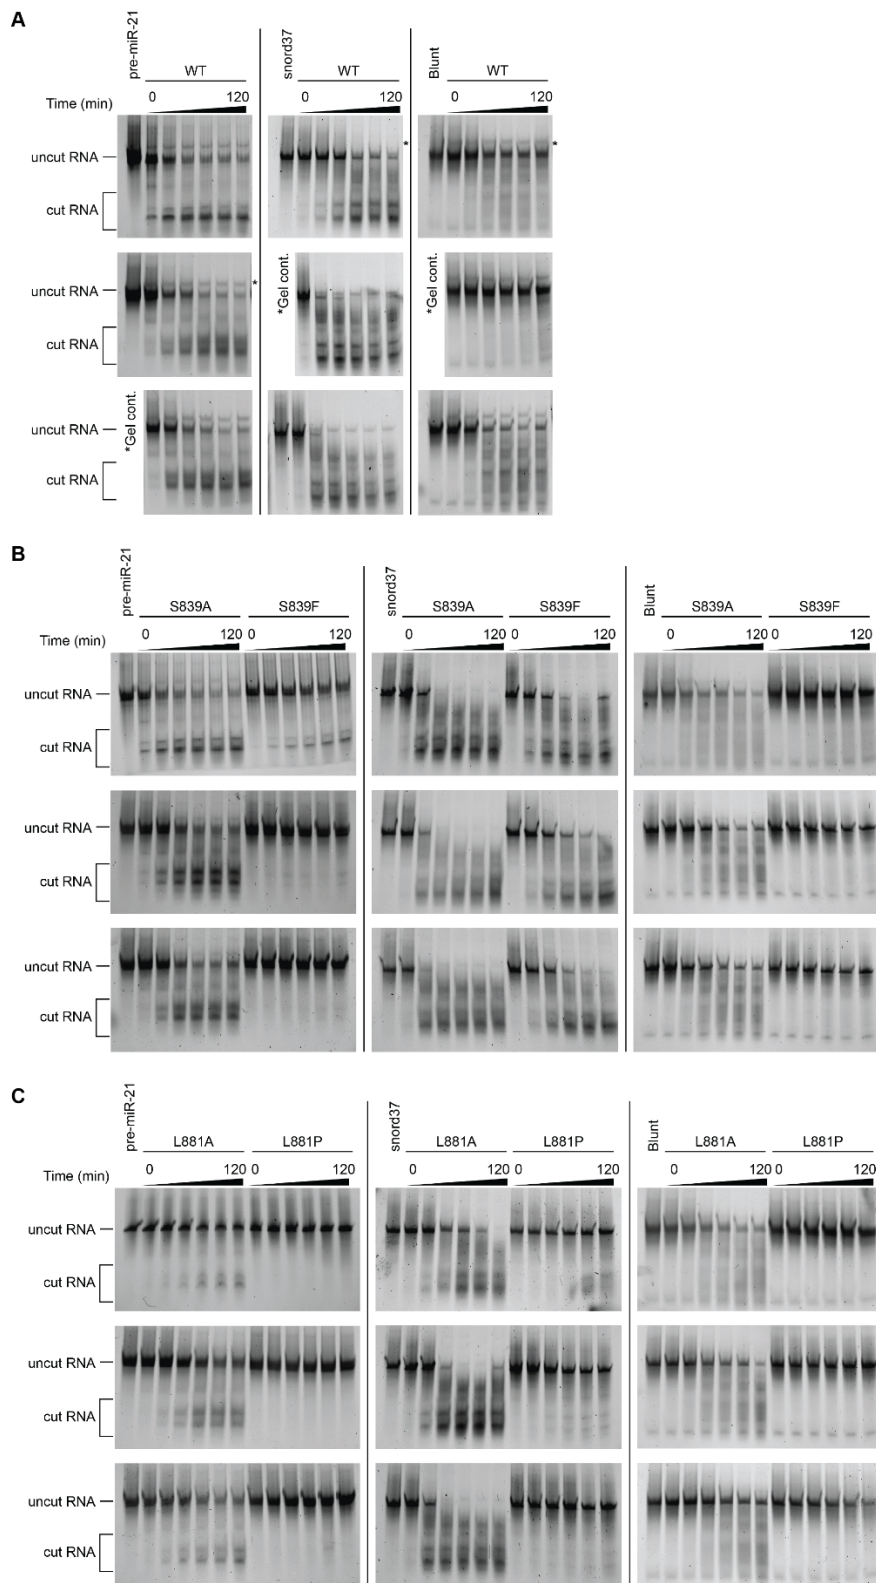

**Figure S4.** Replicates for Dicer cleavage assays in the presence of pre-miR-21, snord37 or Blunt-end pre-miR-21 (Blunt) for (A) WT Dicer, (B) S839 mutants and (C) L881 mutants. (\* signifies that experiment was ran on the same gel)

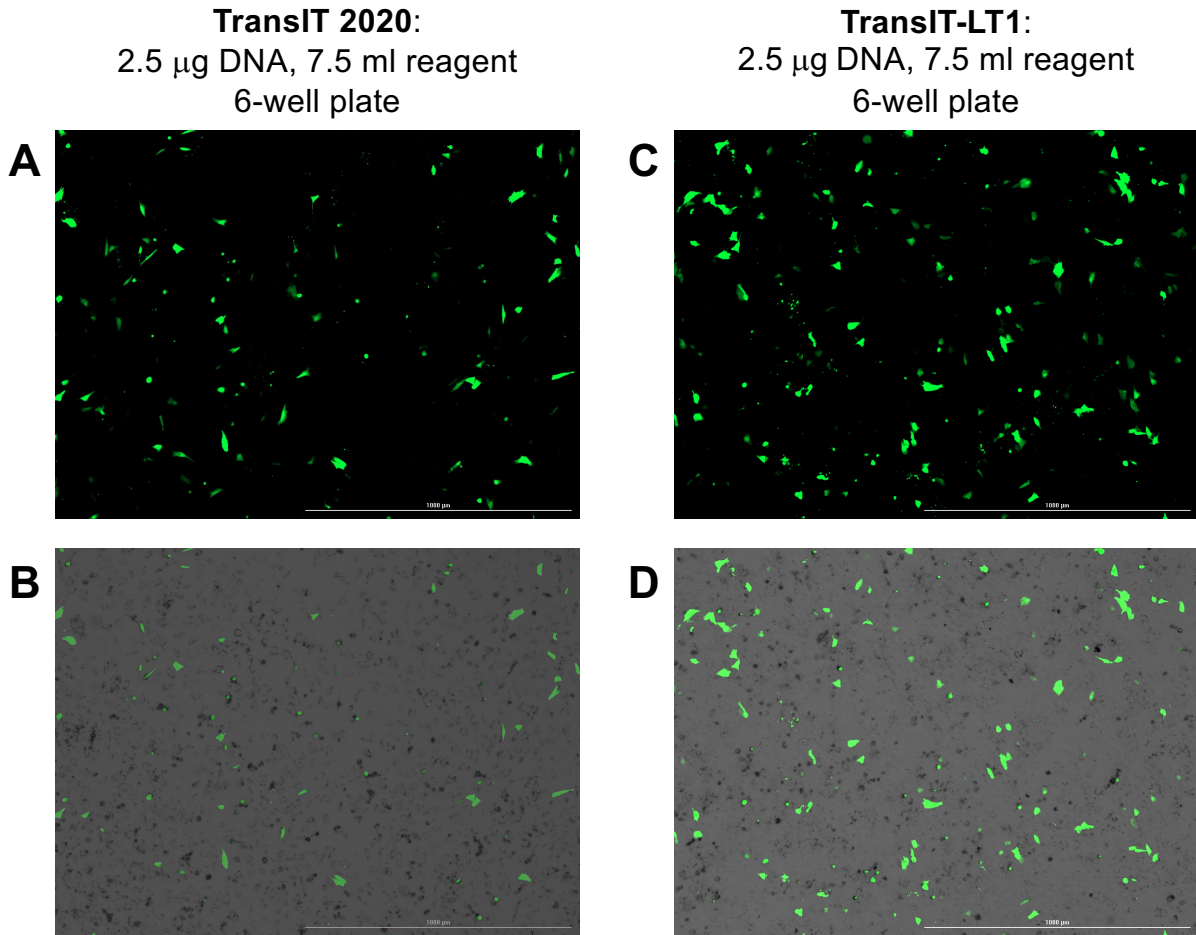

**Figure S5.** Transfection of *Dicer1*<sup>-/-</sup> mouse mesenchymal cells (CRL-3221<sup>TM</sup>). A TurboGFP plasmid was used to identify optimal conditions. Of the transfection reagents tested (Lipofectamine 2000, 300, and LTX; TransIT 2020; and TransIT-LT1), only TransIT-LT1 was found to exhibit suitable transfection efficiency with minimal impact on cell viability. Representative comparative data are shown in this figure. GFP fluorescence and brightfield overlay for TransIT 2020 ((A) and (B)) and TransIT-LT1 ((C) and (D)).

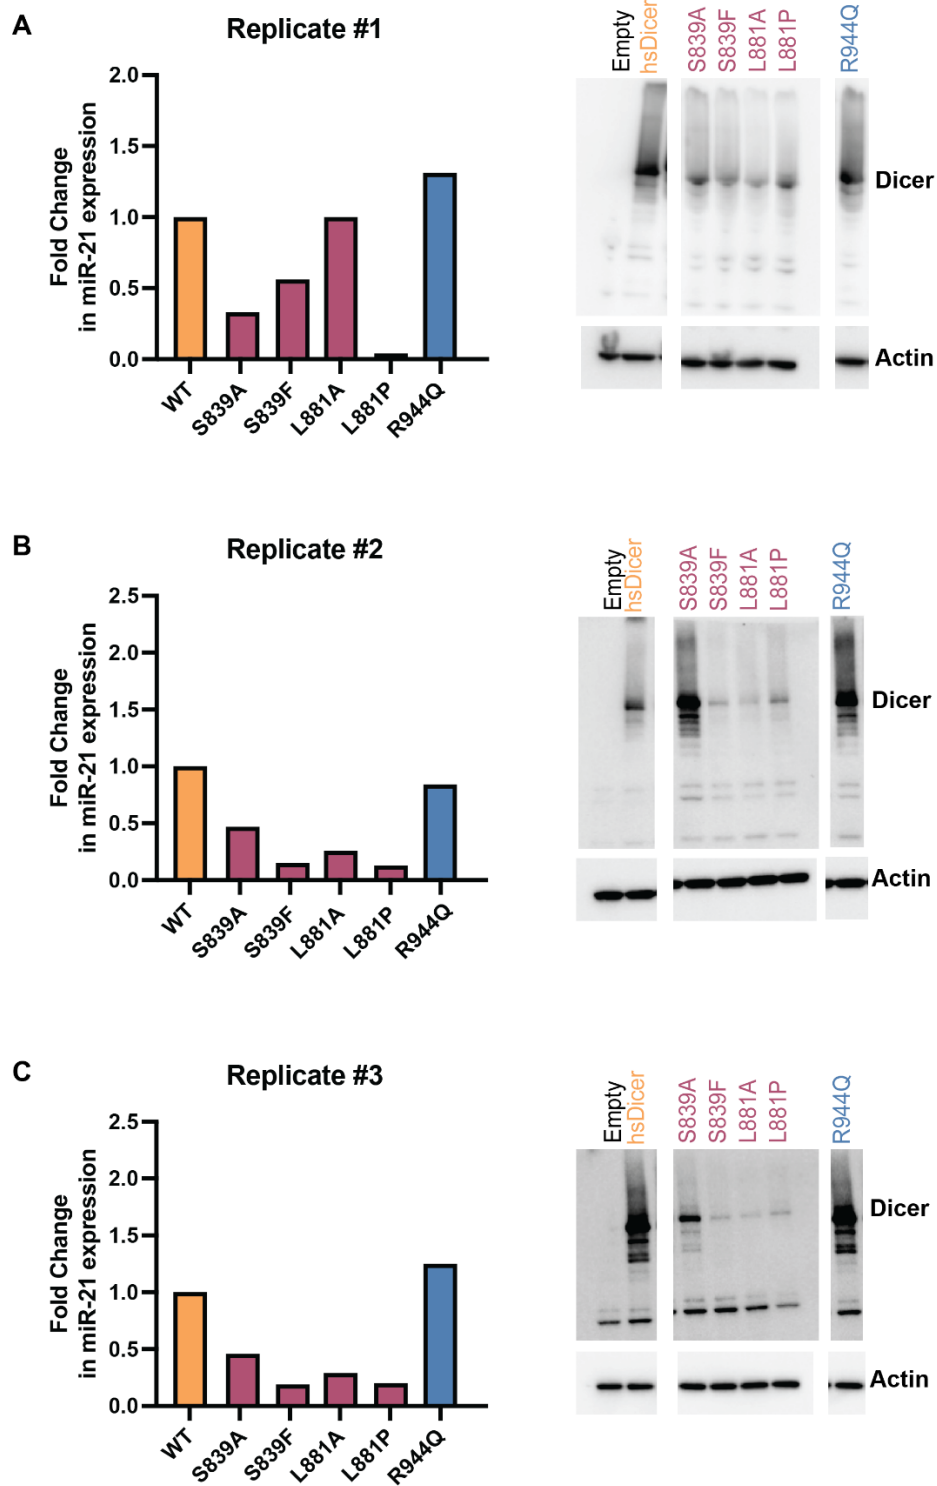

**Figure S6.** qRT-PCR replicates with corresponding Western blots showing relative protein levels of WT and mutant hsDicer. All sample were run on same gel, but the blots were cut to match the order of the corresponding qRT-PCR data.

**Table S1.** Gel quantification from EMSAs showing average across 3 independent experiments and the corresponding standard deviation (SDV)

| <b>WT Dicer</b>   |                             |      |                             |      |                             |      |
|-------------------|-----------------------------|------|-----------------------------|------|-----------------------------|------|
| <b>Time (min)</b> | <b>pre-miR-21</b>           |      | <b>snord37</b>              |      | <b>Blunt pre-miR-21</b>     |      |
|                   | Average Percent % Bound n=3 | SDV  | Average Percent % Bound n=3 | SDV  | Average Percent % Bound n=3 | SDV  |
| 0                 | 0                           | 0.00 | 0                           | 0.01 | 0                           | 0.01 |
| 10                | 28                          | 2.61 | 20                          | 4.29 | 21                          | 1.39 |
| 30                | 28                          | 1.67 | 20                          | 2.09 | 24                          | 1.93 |
| 60                | 27                          | 2.15 | 20                          | 2.17 | 20                          | 4.18 |
| 90                | 27                          | 2.47 | 20                          | 1.43 | 23                          | 2.69 |
| 120               | 28                          | 4.58 | 21                          | 1.86 | 24                          | 1.24 |
| 120               | 30                          | 1.72 | 22                          | 3.91 | 26                          | 4.03 |

  

| <b>S839A</b>      |                             |      |                             |      |                             |      |
|-------------------|-----------------------------|------|-----------------------------|------|-----------------------------|------|
| <b>Time (min)</b> | <b>pre-miR-21</b>           |      | <b>snord37</b>              |      | <b>Blunt pre-miR-21</b>     |      |
|                   | Average Percent % Bound n=3 | SDV  | Average Percent % Bound n=3 | SDV  | Average Percent % Bound n=3 | SDV  |
| 0                 | 0                           | 0.12 | 0                           | 0.20 | 0                           | 0.02 |
| 10                | 21                          | 6.67 | 18                          | 1.51 | 13                          | 5.84 |
| 30                | 26                          | 4.11 | 17                          | 0.63 | 14                          | 6.20 |
| 60                | 21                          | 2.84 | 19                          | 1.52 | 14                          | 5.58 |
| 90                | 27                          | 4.30 | 19                          | 3.61 | 14                          | 5.81 |
| 120               | 25                          | 4.65 | 16                          | 1.86 | 15                          | 6.50 |
| 120               | 25                          | 4.64 | 17                          | 3.66 | 14                          | 6.95 |

  

| <b>S839F</b>      |                             |      |                             |      |                             |      |
|-------------------|-----------------------------|------|-----------------------------|------|-----------------------------|------|
| <b>Time (min)</b> | <b>pre-miR-21</b>           |      | <b>snord37</b>              |      | <b>Blunt pre-miR-21</b>     |      |
|                   | Average Percent % Bound n=3 | SDV  | Average Percent % Bound n=3 | SDV  | Average Percent % Bound n=3 | SDV  |
| 0                 | 0                           | 0.12 | 0                           | 0.20 | 0                           | 0.02 |
| 10                | 3                           | 1.67 | 13                          | 2.11 | 6                           | 3.33 |
| 30                | 4                           | 1.08 | 15                          | 0.44 | 5                           | 2.32 |
| 60                | 5                           | 3.09 | 15                          | 1.76 | 7                           | 2.83 |
| 90                | 5                           | 3.25 | 17                          | 3.40 | 7                           | 4.89 |
| 120               | 5                           | 2.33 | 16                          | 4.93 | 8                           | 4.50 |
| 120               | 5                           | 1.86 | 16                          | 2.11 | 9                           | 4.28 |

  

| <b>L881A</b>      |                             |      |                             |      |                             |      |
|-------------------|-----------------------------|------|-----------------------------|------|-----------------------------|------|
| <b>Time (min)</b> | <b>pre-miR-21</b>           |      | <b>snord37</b>              |      | <b>Blunt pre-miR-21</b>     |      |
|                   | Average Percent % Bound n=3 | SDV  | Average Percent % Bound n=3 | SDV  | Average Percent % Bound n=3 | SDV  |
| 0                 | 0                           | 0.01 | 0                           | 0.11 | 0                           | 0.05 |
| 10                | 9                           | 4.31 | 22                          | 5.62 | 14                          | 2.71 |
| 30                | 10                          | 4.64 | 21                          | 5.58 | 14                          | 3.77 |
| 60                | 11                          | 4.19 | 23                          | 5.89 | 13                          | 4.24 |
| 90                | 12                          | 4.04 | 20                          | 5.95 | 14                          | 2.49 |
| 120               | 11                          | 3.51 | 21                          | 5.13 | 14                          | 3.72 |
| 120               | 12                          | 3.29 | 22                          | 5.05 | 13                          | 5.40 |

  

| <b>L881P</b>      |                             |      |                             |      |                             |      |
|-------------------|-----------------------------|------|-----------------------------|------|-----------------------------|------|
| <b>Time (min)</b> | <b>pre-miR-21</b>           |      | <b>snord37</b>              |      | <b>Blunt pre-miR-21</b>     |      |
|                   | Average Percent % Bound n=3 | SDV  | Average Percent % Bound n=3 | SDV  | Average Percent % Bound n=3 | SDV  |
| 0                 | 0                           | 0.01 | 0                           | 0.11 | 0                           | 0.05 |
| 10                | 3                           | 1.08 | 7                           | 3.07 | 6                           | 1.91 |
| 30                | 3                           | 1.10 | 11                          | 3.07 | 6                           | 3.20 |
| 60                | 4                           | 1.62 | 12                          | 0.95 | 6                           | 1.36 |
| 90                | 5                           | 2.89 | 10                          | 0.91 | 8                           | 2.04 |
| 120               | 4                           | 1.06 | 12                          | 0.11 | 9                           | 0.86 |
| 120               | 4                           | 1.68 | 11                          | 1.46 | 9                           | 1.29 |



**Table S2.** Gel quantification for cleavage assays showing average across 3 independent experiments and the corresponding standard deviation (SDV).

**WT Dicer**

| Time (min) | pre-miR-21                     |      | snord37                        |       |
|------------|--------------------------------|------|--------------------------------|-------|
|            | Average Percent % Cleavage n=3 | SDV  | Average Percent % Cleavage n=3 | SDV   |
| 0          | 0                              | 0.02 | 0                              | 0.03  |
| 10         | 15                             | 7.68 | 6                              | 1.39  |
| 30         | 49                             | 4.15 | 66                             | 40.23 |
| 60         | 68                             | 3.49 | 77                             | 30.86 |
| 90         | 77                             | 2.80 | 92                             | 5.24  |
| 120        | 81                             | 7.01 | 88                             | 8.98  |
|            | 82                             | 6.28 | 89                             | 9.42  |

**S839A**

| Time (min) | pre-miR-21                     |       | snord37                        |       |
|------------|--------------------------------|-------|--------------------------------|-------|
|            | Average Percent % Cleavage n=3 | SDV   | Average Percent % Cleavage n=3 | SDV   |
| 0          | 0                              | 0.04  | 0                              | 0.10  |
| 10         | 12                             | 9.45  | 7                              | 5.64  |
| 30         | 40                             | 13.16 | 84                             | 10.28 |
| 60         | 66                             | 6.74  | 100                            | 0.27  |
| 90         | 78                             | 5.31  | 99                             | 0.34  |
| 120        | 80                             | 3.33  | 99                             | 0.44  |
|            | 76                             | 2.23  | 99                             | 0.51  |

**S839F**

| Time (min) | pre-miR-21                     |       | snord37                        |       |
|------------|--------------------------------|-------|--------------------------------|-------|
|            | Average Percent % Cleavage n=3 | SDV   | Average Percent % Cleavage n=3 | SDV   |
| 0          | 0                              | 0.04  | 0                              | 0.10  |
| 10         | 0                              | 0.20  | 1                              | 0.81  |
| 30         | 3                              | 3.60  | 29                             | 6.14  |
| 60         | 8                              | 8.27  | 61                             | 10.95 |
| 90         | 13                             | 12.09 | 89                             | 5.22  |
| 120        | 16                             | 17.36 | 96                             | 3.02  |
|            | 20                             | 18.56 | 95                             | 6.20  |

**L881A**

| Time (min) | pre-miR-21                     |      | snord37                        |       |
|------------|--------------------------------|------|--------------------------------|-------|
|            | Average Percent % Cleavage n=3 | SDV  | Average Percent % Cleavage n=3 | SDV   |
| 0          | 0                              | 0.06 | 0                              | 0.04  |
| 10         | 3                              | 2.31 | 4                              | 0.40  |
| 30         | 14                             | 2.29 | 41                             | 1.16  |
| 60         | 34                             | 6.72 | 82                             | 0.41  |
| 90         | 56                             | 4.24 | 95                             | 7.71  |
| 120        | 66                             | 7.16 | 97                             | 17.56 |
|            | 68                             | 5.37 | 98                             | 10.38 |

**L881P**

| Time (min) | pre-miR-21                     |      | snord37                        |       |
|------------|--------------------------------|------|--------------------------------|-------|
|            | Average Percent % Cleavage n=3 | SDV  | Average Percent % Cleavage n=3 | SDV   |
| 0          | 0                              | 0.06 | 0                              | 0.04  |
| 10         | 0                              | 0.07 | 1                              | 3.08  |
| 30         | 0                              | 0.35 | 1                              | 36.75 |
| 60         | 0                              | 0.09 | 4                              | 23.20 |
| 90         | 1                              | 1.00 | 13                             | 7.27  |
| 120        | 3                              | 4.36 | 24                             | 3.16  |
|            | 0                              | 0.25 | 20                             | 2.57  |

**Table S3.** Quantification of qRT-PCR from Figure S5 showing relative fold changes in miR-21 expression and corresponding calculations across three independent experiments. Calculations were performed after total RNA was normalized to U6 snRNA and then relative fold changes in miR-21 expression for Dicer mutants were calculated relative to normalized WT Dicer (AVG - Average; SD – Standard Deviation; SEM – Standard Error of Mean).

| <b>Dicer Construct</b> | Am_4537<br>(miR-21) | Am_4548<br>(miR-21) | Am_4552<br>(miR-21) | AVG  | SD   | SEM  |
|------------------------|---------------------|---------------------|---------------------|------|------|------|
| <b>WT</b>              | 1                   | 1                   | 1                   | 1    | 0    | 0    |
| <b>S839A</b>           | 0.33                | 0.47                | 0.46                | 0.42 | 0.08 | 0.09 |
| <b>S839F</b>           | 0.56                | 0.15                | 0.19                | 0.30 | 0.23 | 0.16 |
| <b>L881A</b>           | 1                   | 0.26                | 0.29                | 0.52 | 0.42 | 0.22 |
| <b>L881P</b>           | 0.04                | 0.13                | 0.2                 | 0.12 | 0.08 | 0.09 |
| <b>R944Q</b>           | 1.31                | 0.84                | 1.25                | 1.13 | 0.26 | 0.17 |

**Table S4:** Quantification of Western blots from Figure S5 showing relative protein levels and corresponding calculations across three independent experiments. Calculations were performed after WT Dicer was normalized to Actin and then relative protein levels for Dicer mutants were calculated relative to normalized WT Dicer protein levels (AVG - Average; SD – Standard Deviation; SEM – Standard Error of Mean).

| <b>Dicer Construct</b> | Am_4537<br>(Protein level) | Am_4548<br>(Protein level) | Am_4552<br>(Protein level) | AVG   | SD    | SEM   |
|------------------------|----------------------------|----------------------------|----------------------------|-------|-------|-------|
| <b>WT</b>              | 1                          | 1                          | 1                          | 1     | 0     | 0     |
| <b>S839A</b>           | 0.722                      | 1.313                      | 0.272                      | 0.769 | 0.522 | 0.240 |
| <b>S839F</b>           | 0.394                      | 0.145                      | 0.045                      | 0.195 | 0.179 | 0.141 |
| <b>L881A</b>           | 0.372                      | 0.167                      | 0.036                      | 0.192 | 0.169 | 0.137 |
| <b>L881P</b>           | 0.496                      | 0.452                      | 0.072                      | 0.340 | 0.232 | 0.160 |
| <b>R944Q</b>           | 1.313                      | 1.846                      | 1.090                      | 1.417 | 0.388 | 0.207 |
